# Supplementary material for: Canthal V-plasty for Floppy Eyelid Surgery
Source: PubMed Central journal article supplement — Plast Reconstr Surg Glob Open. 2019 Oct 29;7(10):e2464. doi: 10.1097/GOX.0000000000002464 (PMC6846288; doi:10.1097/gox.0000000000002464), 2019-10-29
Supplement: gox-7-e2464-s004.pdf [file gox-7-e2464-s004.pdf]

# SDC 4

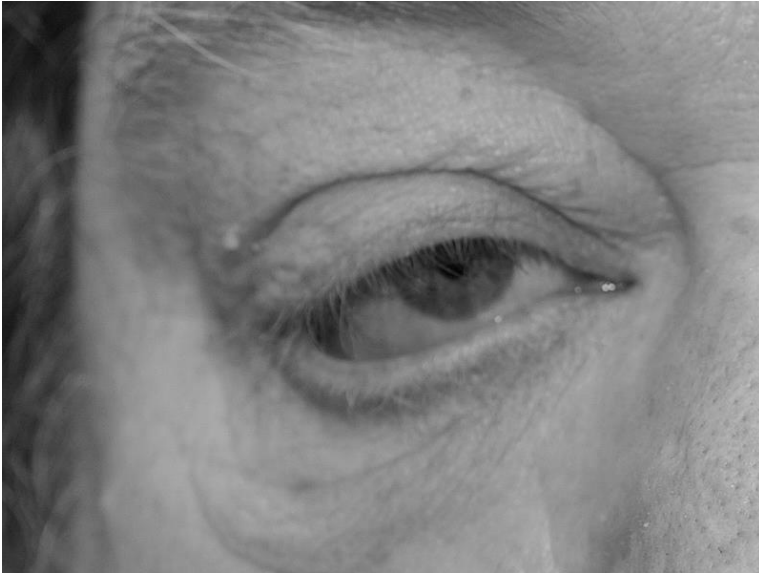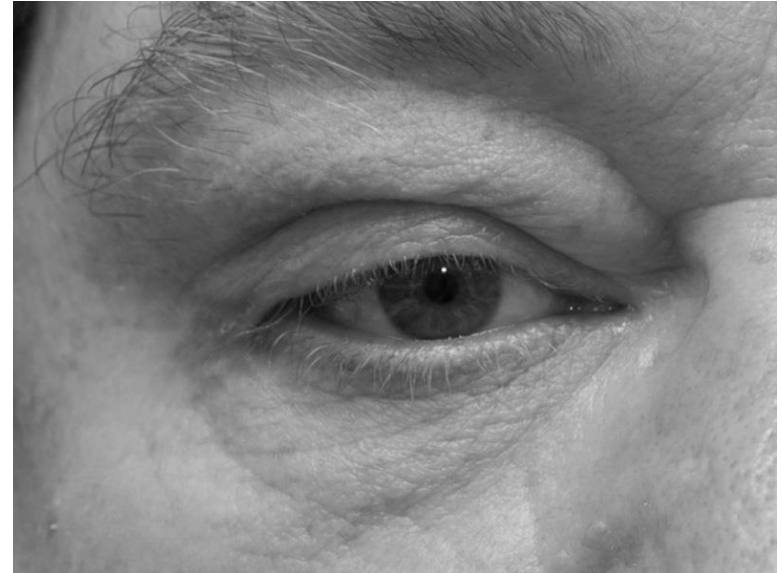

Supplemental Digital Content 4A and B: The pre- and post-operative appearance of a patient after undergoing simultaneous repair of severely lax upper and lower eyelids with the lateral canthal "V" incision and tarsal strip fixation.
